# Supplementary material for: Enhanced insulin receptor, but not PI3K, signalling protects podocytes from ER stress
Source: PubMed Central journal article supplement (PMC5834602; doi:10.1038/s41598-018-22233-9), 2018-03-02

## Enhanced insulin receptor, but not PI3K, signalling protects podocytes from ER stress

Kathryn L Garner, Virginie M S Betin, Vanda Pinto, Mark Graham,  
Emmanuelle Abgueuen, Matt Barnes, David C Bedford, Craig A McArdle, Richard J M Coward.

**Supplementary Figure 1: Treatment of wild-type podocytes for 2 days or more promotes widespread cell loss.** Podocytes were treated for 1, 2, 3 or 4 days with (a)  $10^{-9}$ - $10^{-6}$  M Thapsigargin, (b)  $10^{-9}$ - $10^{-5}$  M Tunicamycin, or (c)  $10^{-5}$ - $10^{-3}$  M Palmitate, before being fixed, stained with DAPI and imaged. Raw cell counts are shown for 3 fields per well, duplicate wells per condition.

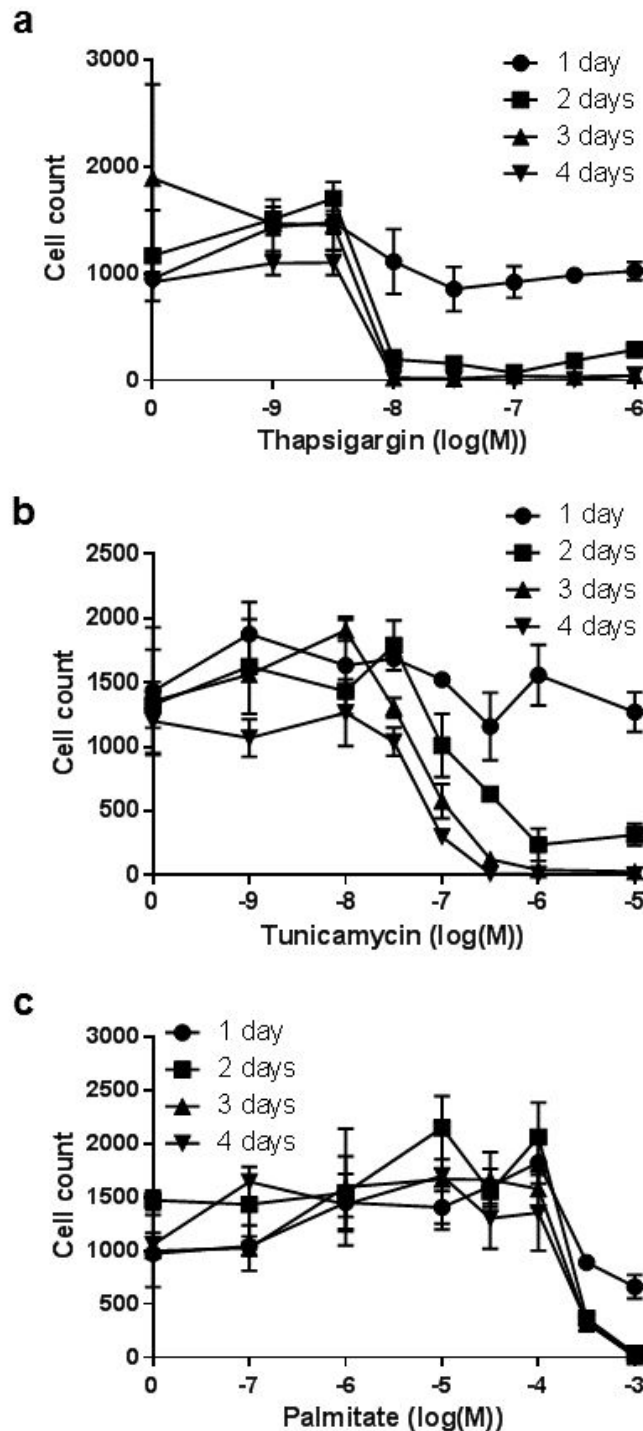

**Supplementary Figure 2: GRP78 and p-PERK expression in wt and wt-IR podocytes treated with diabetic media.** (a) WT or wt-IR podocytes cultured in normal growth media ('ctrl') or diabetic media ('D') during differentiation were treated without or with 300  $\mu$ M palmitate for the final 24 hr before being lysed and subjected to western blotting for GRP78 ( $n=3$ ). GRP78 expression normalised relative to  $\beta$ -actin loading control, then a ratio of palmitate-treated GRP78 divided by untreated GRP78 in each condition plotted. Paired  $t$  test, wt and wt + D \*  $p<0.05$ , wt-IR and wt-IR + D, not significant ('ns'). Unpaired  $t$  test with Welch's correction, wt + D and wt-IR + D \*\*  $p<0.01$ . (b) The same samples as in (a) were additionally subjected to western blotting for phospho (p)-PERK, normalised relative to total PERK as a loading control ( $n=3$ ). Paired  $t$  test, wt and wt + D \*\*\*  $p<0.001$ , wt-IR and wt-IR + D, not significant ('ns'). Unpaired  $t$  test with Welch's correction, wt + D and wt-IR + D \*  $p<0.05$ .

**a**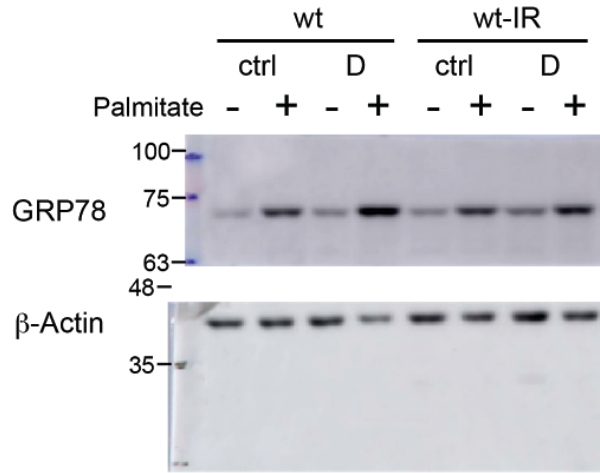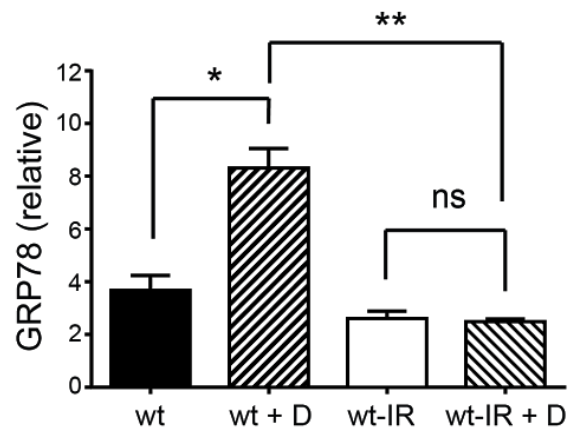**b**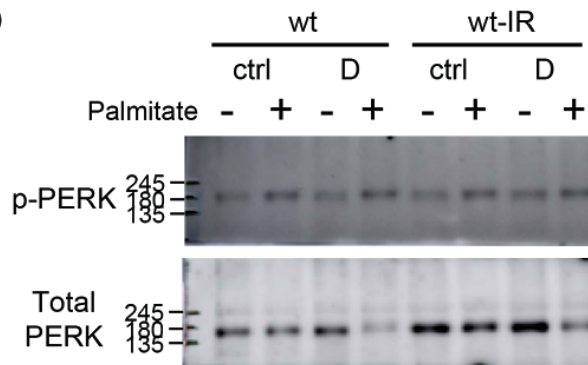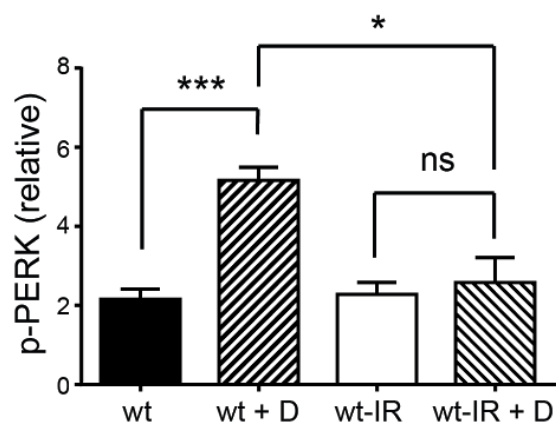

**Supplementary Figure 3: Herp assay for ER stress in podocytes.** Podocytes treated with  $10^{-9}$ - $10^{-6}$  M Thapsigargin,  $10^{-9}$ - $10^{-5}$  M Tunicamycin or  $10^{-5}$ - $10^{-3}$  M Palmitate for 24 hr were fixed and permeabilised, stained with DAPI and immunostained for Herp. Cells were imaged and cytoplasmic intensity of Herp staining was quantified in a 3  $\mu$ m collar around the nucleus.

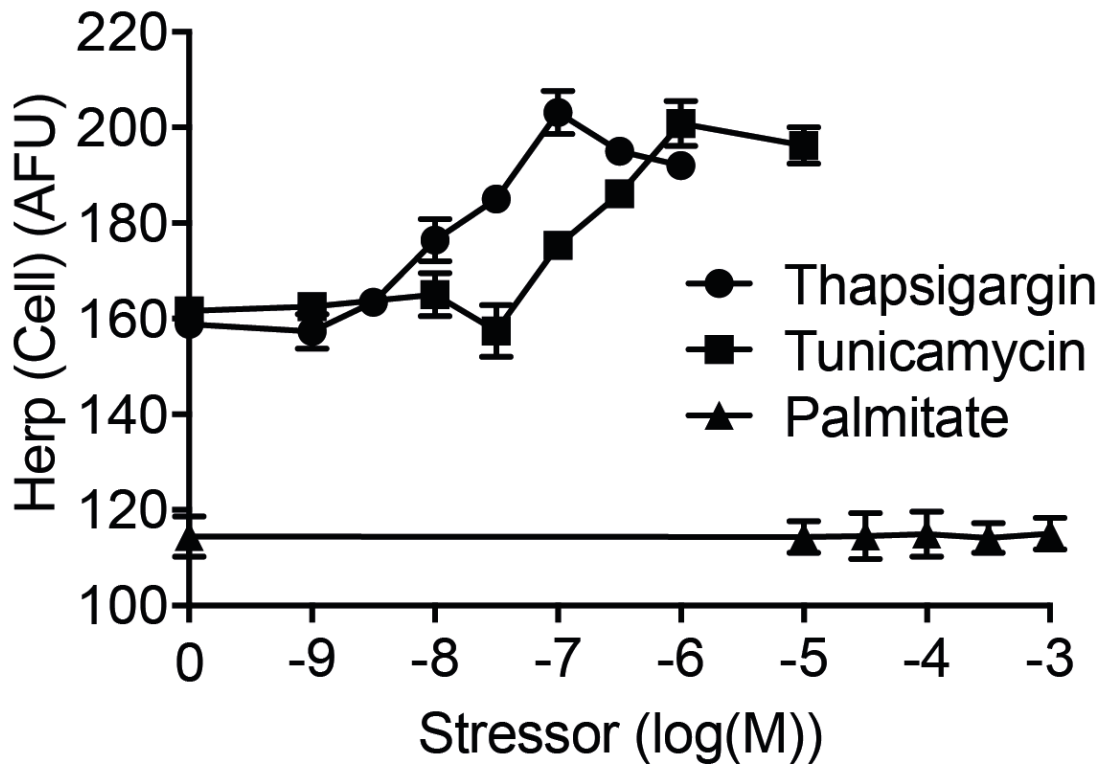

**Supplementary Figure 4: GRP78, CHOP, IR, PTEN and PTP1B expression by western blot.** (a) GRP78 expression in wt podocytes untreated or treated with 300  $\mu$ M palmitate for 24 hr. (Cropped version shown in Fig. 1 c.) (b) CHOP expression in wt podocytes untreated or treated for 24 hr with 100 nM thapsigargin ('TG'), 1  $\mu$ M tunicamycin ('Tuni'), or 300  $\mu$ M palmitate ('PA'). (Cropped version shown in Fig. 1 f.) (c) IR $\beta$  subunit and  $\beta$ -actin expression in wt-IR podocytes compared with wt cells. (Cropped version shown in Fig. 2 a.) (d) PTP1B and GAPDH expression in PTP1B kd cells compared with wt and cells transduced with a lentivirus containing a scrambled (scr) sequence. (Cropped version shown in Fig. 3 a.) (e) PTEN and  $\beta$ -actin expression in PTEN kd cells compared with wt and scr cells. Three repeat experiments shown. (Cropped version shown in Fig. 5 a.)

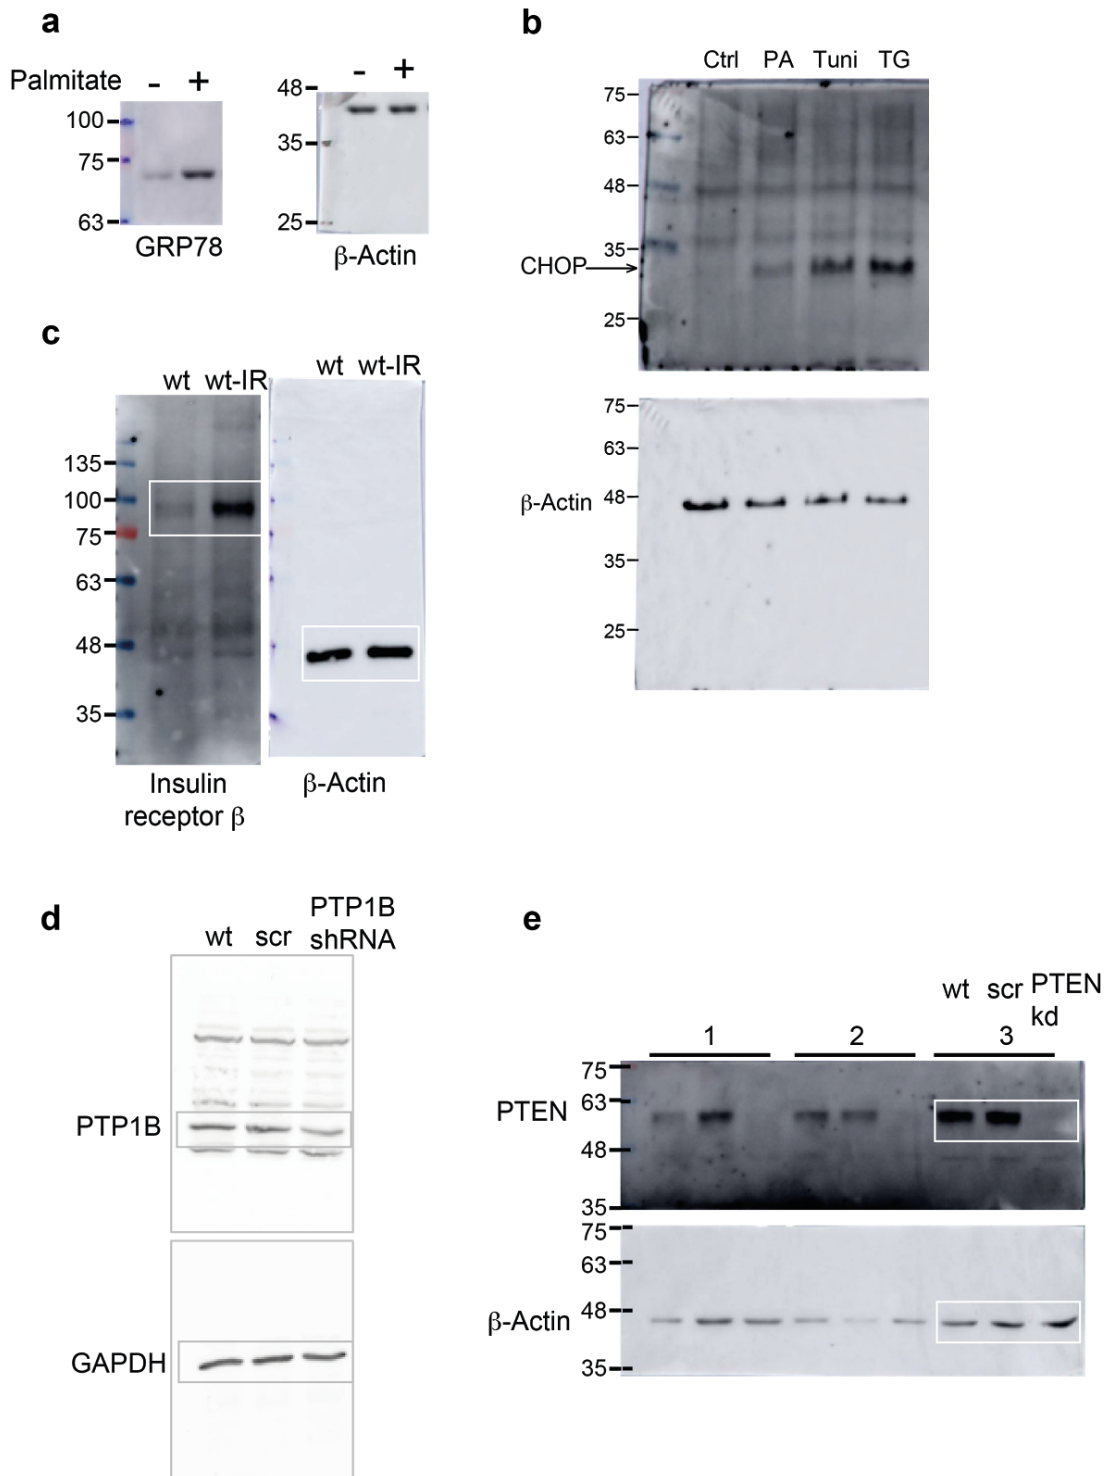

Supplement: 41598_2018_22233_MOESM1_ESM.pdf [file 41598_2018_22233_MOESM1_ESM.pdf]
